# Supplementary material for: Molecular Remodeling of Left and Right Ventricular Myocardium in Chronic Anthracycline Cardiotoxicity and Post-Treatment Follow Up
Source: PubMed Central journal article supplement (PMC4013127; doi:10.1371/journal.pone.0096055), 2014-05-07
Supplement: pone.0096055.s003.pdf [file pone.0096055.s003.pdf]

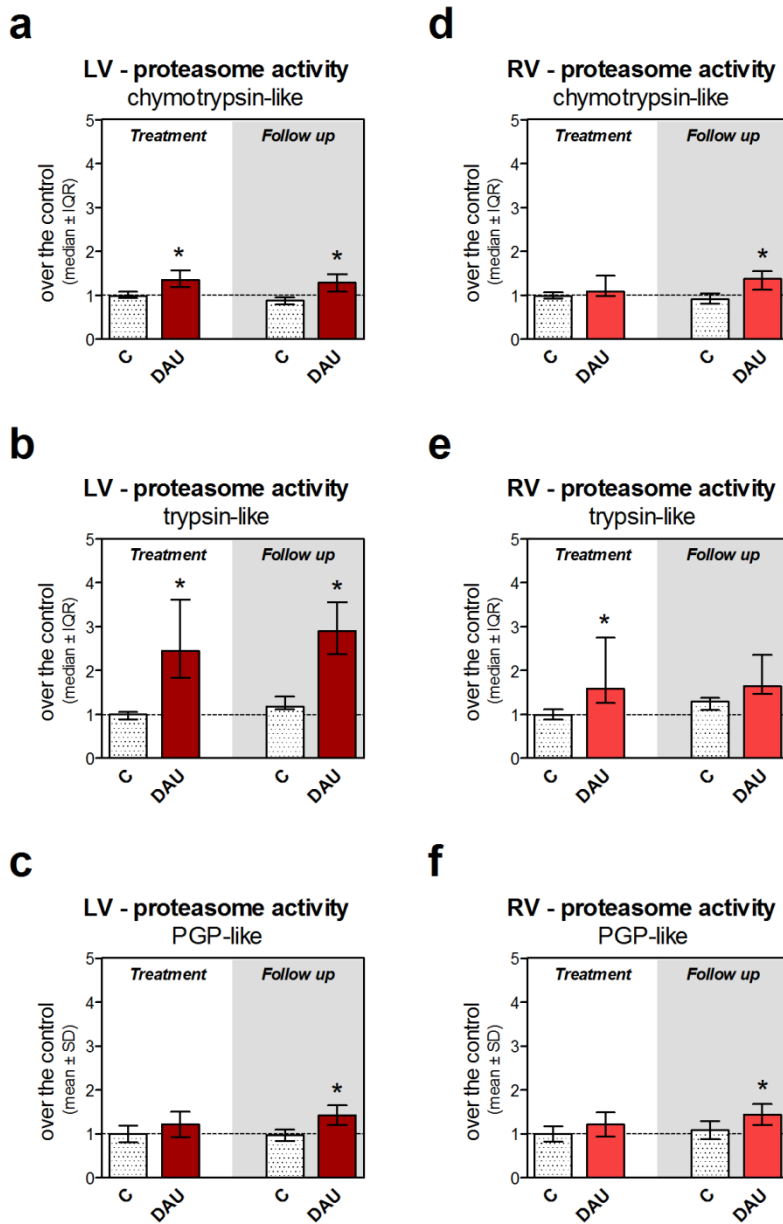

**Figure S3. Activity of proteasome system in chronic anthracycline cardiotoxicity and post-treatment follow up.** Changes in activity of proteasome chymotrypsin-like (a, d), trypsin-like (b, e) and PGP-like activities (c, f) in the left and right ventricular myocardium, respectively. Statistical significances (One Way ANOVA/One Way ANOVA on Ranks according to data character,  $P < 0.05$ ) within each study period (\*). C - control group, DAU - daunorubicin group.
