# Supplementary material for: Molecular Remodeling of Left and Right Ventricular Myocardium in Chronic Anthracycline Cardiotoxicity and Post-Treatment Follow Up
Source: PubMed Central journal article supplement (PMC4013127; doi:10.1371/journal.pone.0096055), 2014-05-07
Supplement: pone.0096055.s004.pdf [file pone.0096055.s004.pdf]

**a**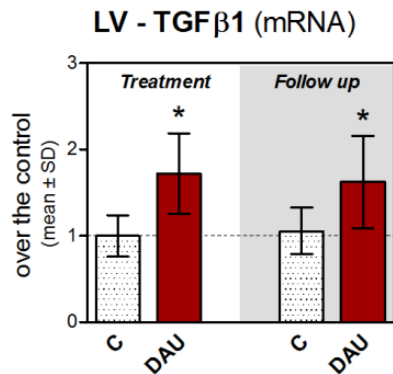**b**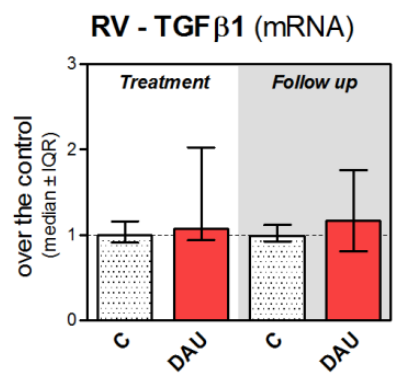

**Figure S4. Expression of transforming growth factor beta 1 in chronic anthracycline cardiotoxicity and post-treatment follow up.** Gene expression in the left (a) and right (b) ventricular myocardium, respectively. Statistical significances (One Way ANOVA/One Way ANOVA on Ranks according to data character,  $P < 0.05$ ) within each study period (\*). TGF $\beta$ 1 - transforming growth factor beta 1, C - control group, DAU - daunorubicin group.
